**Table S1.** Dimensions of flexural samples

| <b>Chitosan to<br/>Regolith (dry<br/>w/w ratio)</b> | <b>Width (mm)</b> | <b>Height (mm)</b> | <b>Length (mm)</b> | <b>Density (kg/m<sup>3</sup>)</b> | <b>No. of<br/>samples</b> |
|-----------------------------------------------------|-------------------|--------------------|--------------------|-----------------------------------|---------------------------|
| 1:25                                                | 5.18 ± 0.33       | 6.16 ± 0.11        | 106.34 ± 0.96      | 1085.52 ± 58.40                   | 6                         |
| 1:50                                                | 5.40 ± 0.10       | 7.15 ± 0.09        | 112.11 ± 0.39      | 1264.74 ± 16.99                   | 6                         |
| 1:75                                                | 5.67 ± 0.06       | 7.65 ± 0.10        | 113.40 ± 0.39      | 1446.02 ± 47.69                   | 5                         |
| 1:100                                               | 5.87 ± 0.25       | 7.90 ± 0.33        | 115.43 ± 0.14      | 1493.81 ± 62.40                   | 6                         |
| 1:125                                               | 6.17 ± 0.27       | 8.13 ± 0.17        | 116.44 ± 0.19      | 1596.07 ± 41.89                   | 6                         |
